# Supplementary material
Source: PubMed Central journal article supplement (PMC10209831)
Supplement: jamapsychiatry-e231265-s002.pdf [file jamapsychiatry-e231265-s002.pdf]

## Data Sharing Statement

Nersesjan. COVID-19 and Risk for Mental Disorders Among Adults in Denmark. *JAMA Psychiatry*. Published May 24, 2023. doi:10.1001/jamapsychiatry.2023.1265

### Data

**Data available:** No

### Additional Information

**Explanation for why data not available:** All data are available to all researchers based in Denmark after the relevant approvals from the Danish Health authorities
